# Supplementary material for: Silencing the SpMPK1, SpMPK2, and SpMPK3 Genes in Tomato Reduces Abscisic Acid—Mediated Drought Tolerance
Source: Int J Mol Sci. 2013 Nov 6;14(11):21983–96. doi: 10.3390/ijms141121983 (PMC3856046; doi:10.3390/ijms141121983)
Supplement: Supplementary file 1 [file ijms-14-21983-s001.pdf]

# Supplementary Information

**Table S1.** Primers used in this study.

| Primer code    | Primer sequences (5'–3')                       | GenBank<br>accession no. | Products<br>lengths (bp) | Objectives                                                            |
|----------------|------------------------------------------------|--------------------------|--------------------------|-----------------------------------------------------------------------|
| COSM121F       | GGCGC <b>GAGCTC</b> CATGGTGGCAGGTTTCATTC       | AY261512                 | 577                      | For cosilencing of <i>SpMPK1/2</i>                                    |
| COSM121R       | CGGCG <b>CTCGAGG</b> CTCAGGTGGACGATACCAT       |                          |                          |                                                                       |
| SM1F           | GGCGC <b>GAGCTC</b> ATAATTGCTGACAGATTGTTGC     | AY261512                 | 200                      | To specifically silence <i>SpMPK1</i>                                 |
| SM1R           | CGGCG <b>CTCGAGC</b> ATTTTCAGTCTAAAATAAAATCCAC |                          |                          |                                                                       |
| SM2F           | GGCGC <b>GAGCTC</b> GTACTCGCTCGTTTGCTGTT       | AY261513                 | 214                      | To specifically silence <i>SpMPK2</i>                                 |
| SM2R           | CGGCG <b>CTCGAGC</b> ATTTCTGGAATAAAAATACAGAT   |                          |                          |                                                                       |
| SM3F           | GGCGC <b>GAGCTC</b> GCATAAGAGAAATCAGTTCTTCTCT  | AK319930                 | 409                      | To specifically silence <i>SpMPK3</i>                                 |
| SM3R           | CGGCG <b>CTCGAG</b> ACACCCAAAACCTTCAAATGAC     |                          |                          |                                                                       |
| COSM1231F      | GGCGC <b>GAGCTC</b> ACTGATCTCCATCAAATTATTCG    | AY261512                 | 252                      | For cosilencing of <i>SpMPK1/2/3</i>                                  |
| COSM1231R      | <b>GCTCTAGA</b> AGGTGGACGATACCATCTTG           |                          |                          |                                                                       |
| COSM1233F      | AATTGTCATCTCATGCTGGACA                         | AY261514                 | 220                      |                                                                       |
| COSM1233R      | CGGCG <b>CTCGAGA</b> AATTTACGGAGCGTCCT         |                          |                          |                                                                       |
| SPDSF          | GGCGC <b>GAGCTC</b> GGCACTCAACTTTATAAACC       | NM_001247166             | 409                      | To silence <i>SpPDS</i>                                               |
| SPDSR          | CGGCG <b>CTCGAGC</b> TTTCAGTTTCTGTCAAACC       |                          |                          |                                                                       |
| EF1 $\alpha$ F | GACAGGCGTTTCAGGTAAGG                           | X14449                   | 127                      | To assess the transcription levels of <i>SpEF1<math>\alpha</math></i> |
| EF1 $\alpha$ R | CCAATGGAGGGTATTCAGC                            |                          |                          |                                                                       |
| qM1F           | ATCCCAGAAGGAGAATAACAG                          | AY261512                 | 228                      | To assess the transcription levels of <i>SpMPK1</i>                   |
| qM1R           | ATCAAACCTGcAACAATCTG                           |                          |                          |                                                                       |
| qM2F           | ATTCCACCACCTCAACGA                             | AY261513                 | 196                      | To assess the transcription levels of <i>SpMPK2</i>                   |
| qM2R           | TGCTAGGCTTCAAGTCCC                             |                          |                          |                                                                       |
| qM3F           | GCAACTCCCACAACATCC                             | AY261514                 | 233                      | To assess the transcription levels of <i>SpMPK3</i>                   |
| qM3R           | TCTGCTCTTCTCCTATCCCT                           |                          |                          |                                                                       |
| qPDSF          | ATGCCACGACCAGAAGAT                             | NM_001247166             | 200                      | To assess the transcription levels of <i>SpPDS</i>                    |
| qPDSR          | TGCTGTAGACAAACCACCC                            |                          |                          |                                                                       |
| qCAT1F         | GTGGATTATTGCCCCTCG                             | NM_001247898             | 152                      | To assess the transcription levels of <i>SpCAT1</i>                   |
| qCAT1R         | GGTTCCCATGATCTGTACCTC                          |                          |                          |                                                                       |
| qCAT2F         | TCTGAAGCCAAATCCTAAGTC                          | NM_001247257             | 109                      | To assess the transcription levels of <i>SpCAT2</i>                   |
| qCAT2R         | CAATATCGTCGAAGAGGAAAGT                         |                          |                          |                                                                       |

Note: words in red are restriction sites added to Forward primers and Reverse primers.

**Figure S1.** Stomatal Development in control (pTRV2:00) and individual and combined gene-silenced plants. **(A)** The distribution of stomata on the leaves of experimental plants. Control plants follow the one-cell spacing rule (**a**); For gene-silenced plants, clustered stomata are formatted in leaves' lower epidermis (**b–f**); The order is pTRV2:MPK1, pTRV2:MPK2, pTRV2:MPK3, pTRV2:MPK1/MPK2, pTRV2:MPK1/MPK2/MPK3). Bar = 20  $\mu$ m in (**a–f**); and **(B)** Stomatal index of the adaxial surface of experimental leaves. Stomatal index (SI) is calculated using the formula proposed by Salisbury (1927):  $SI = [S/(E + S)] \times 100\%$ , where  $S$  equals the number of stomata per unit of leaf area and  $E$  equals the number of epidermal cells in the same unit area. At least 3 visions from each sample of ten gene-silenced plants were measured. Data represent means  $\pm$  SD. Unexpectedly, there is no significant difference between the 5 types of gene-silenced plants and control plants.

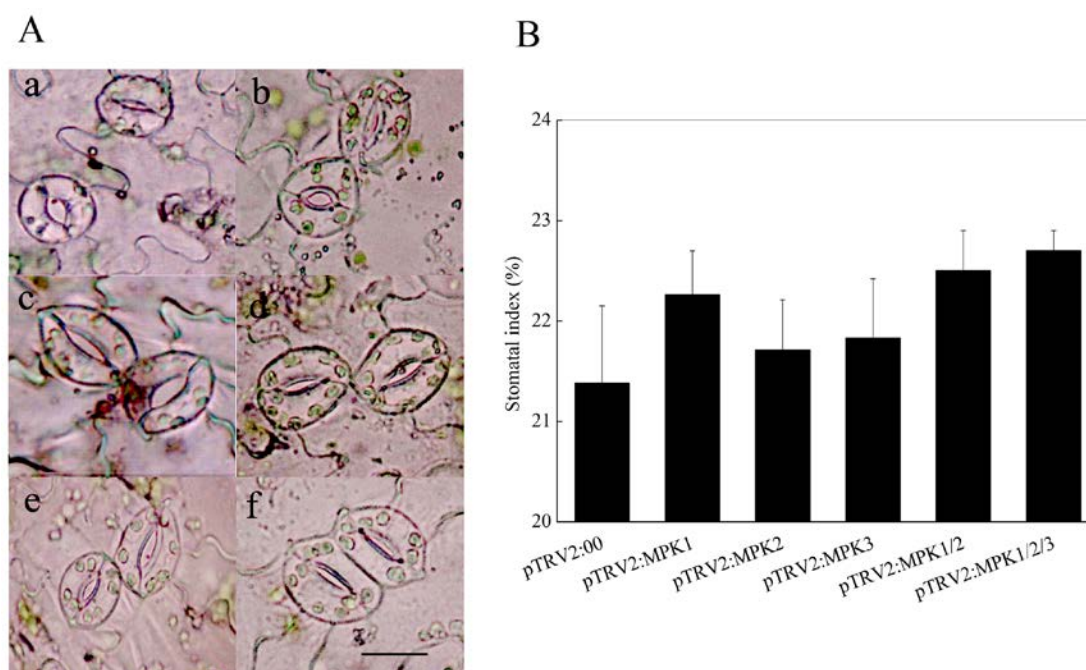

**Figure S2.** Real-time qRT-PCR analysis of ABA induction of *SpMPK1*, *SpMPK2* and *SpMPK3* genes. 40-day-old wild-type plants were treated with 150  $\mu$ M ABA for 6 h. Total RNA was obtained from treated plants and analyzed by qRT-PCR using the gene-specific primers listed in Table S1. The graphs indicate the induction fold of the *SpMPK1*, *SpMPK2* and *SpMPK3* genes in response to ABA (150  $\mu$ M) as compared with that of control (0  $\mu$ M ABA). The mean value of three technical replicates was normalized to the levels of elongation factor 1- $\alpha$  subunit mRNA, an internal control.

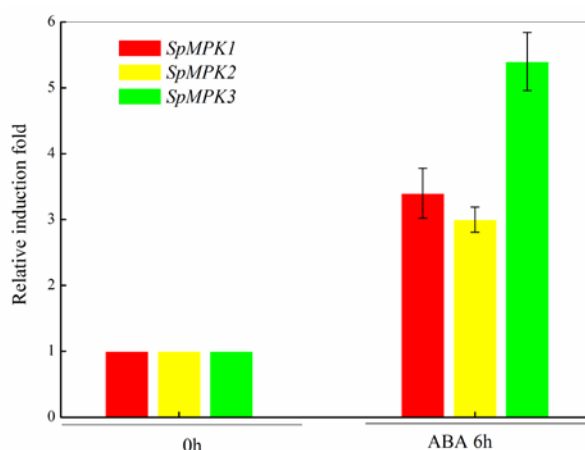

**Figure S3.** Silencing efficiency of *SpPDS* in wild-type tomato plants. (A) The photobleaching phenotype induced by pTRV:*PDS* in *Solanum pimpinellifolium*; (B) Leaf samples for RNA analysis come from the fifth to the ninth true leaves; and (C) Qualification of silencing efficiency. Leaf silencing efficiency is calculated by comparing the number of a certain true leaf that showed symptoms with the total number of plants inoculated with pTRV2:*PDS* 40 days post-inoculation. The experiments were representative of all the silenced plants ( $n \geq 50$  at  $OD_{600} = 2.0$ ). Quantitative RT-PCR was performed to evaluate the gene silencing efficiency and it was presented by the reduction of *SpPDS* transcription levels in VIGS plants compared to control plants which were defined as 100%.

A

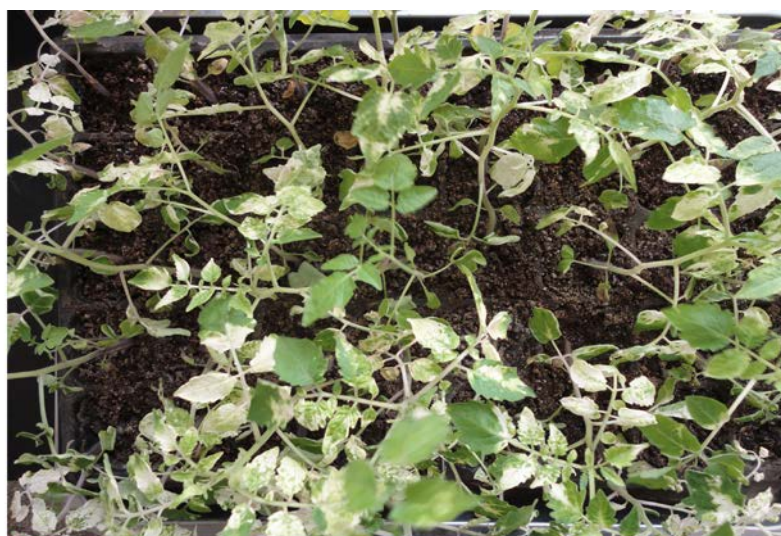

Figure S3. Cont.

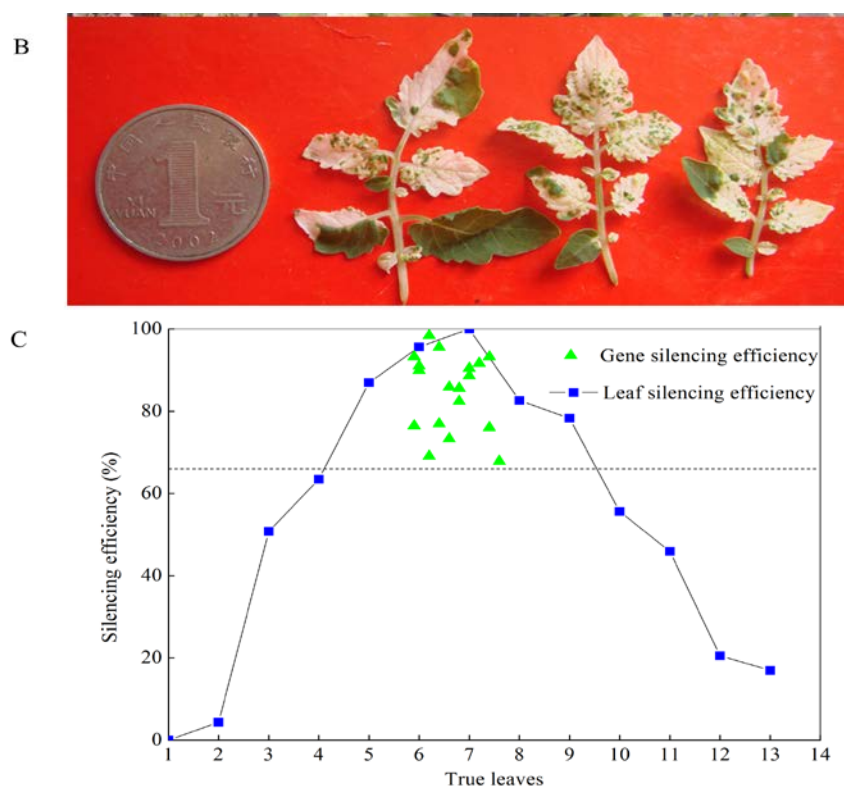

© 2013 by the authors; licensee MDPI, Basel, Switzerland. This article is an open access article distributed under the terms and conditions of the Creative Commons Attribution license (<http://creativecommons.org/licenses/by/3.0/>).
